# Supplementary material for: Multiple Soluble TGF-β Receptors in Addition to Soluble Endoglin Are Elevated in Preeclamptic Serum and They Synergistically Inhibit TGF-β Signaling
Source: Oxford University Press journal article supplement (doi:10.1210/jc.2017-01150), 2017-06-14
Supplement: jc.2017-01150_Supplementary_Figure_1.pdf [file jc.2017-01150_Supplementary_Figure_1.pdf]

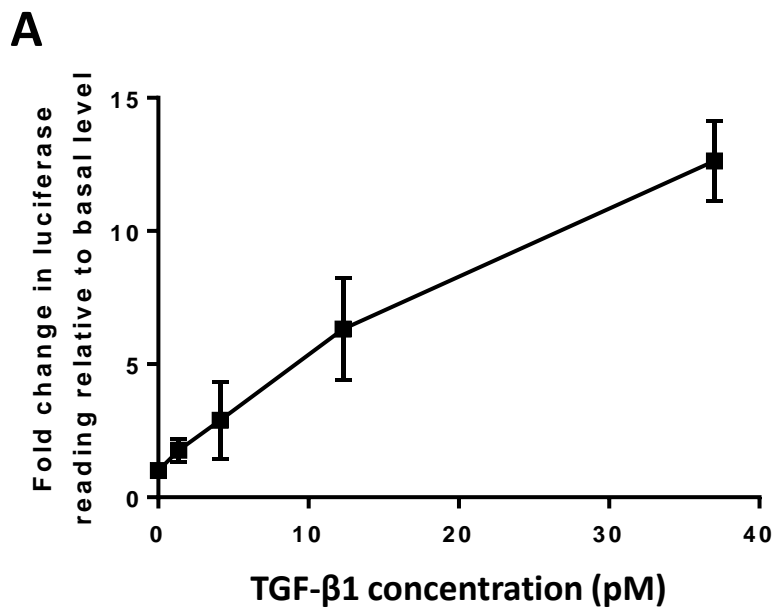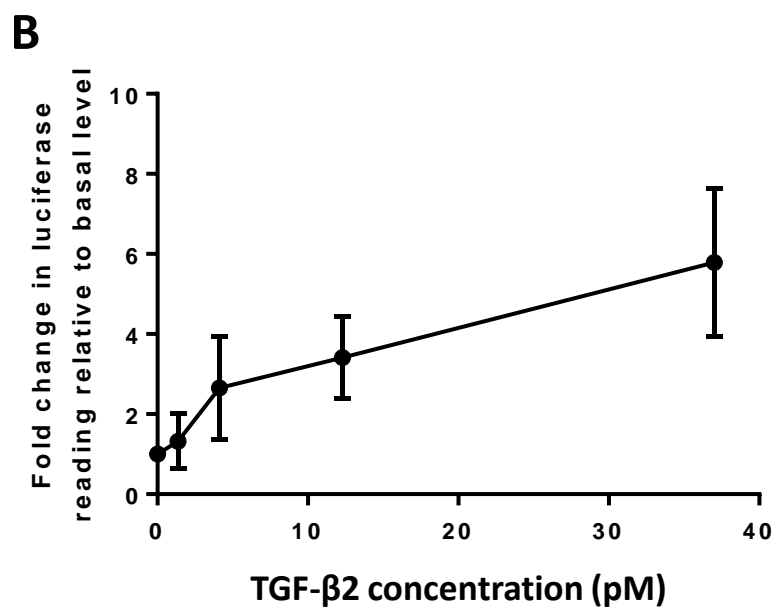

**Supplementary Fig 1.** Dose responses of TGF- $\beta$ 1 and TGF- $\beta$ 2 stimulation of TGF- $\beta$  responsive luciferase reporter in HEK293 cells. (A) TGF- $\beta$ 1. (B) TGF- $\beta$ 2. Data are presented as fold changes (mean  $\pm$  SD) in luciferase reading relative to basal level from two independent experiments.
